# Supplementary material for: Effect of mechanical disruption on the effectiveness of three reactors used for dilute acid pretreatment of corn stover Part 2: morphological and structural substrate analysis
Source: PubMed Central journal article supplement (PMC4022059; doi:10.1186/1754-6834-7-47), 2014-04-01
Supplement: 1754-6834-7-47-S1.pdf [file 1754-6834-7-47-S1.pdf]

**Table S1.** Composition of Untreated Corn Stover Samples.

| <b>% Composition of Untreated Corn Stover</b> |      |
|-----------------------------------------------|------|
| Glucan                                        | 34.0 |
| Xylan                                         | 22.0 |
| Arabinan                                      | 3.1  |
| Galactan                                      | 1.6  |
| Acetyl                                        | 2.9  |
| Lignin                                        | 12.3 |
| Sucrose                                       | 4.0  |
| Structural Organics                           | 4.5  |
| Non-Structural Organics                       | 1.2  |
| Water Extractable Others                      | 6.1  |
| Ethanol Extractives                           | 2.2  |
| Total Ash                                     | 5.8  |
| Total                                         | 99.1 |

**Table S2.** Summary of Qualitative Imaging Observations.

Summary of Qualitative Imaging Observations

| <i>Sample</i>    | <i>Tissues</i> |                    |                 | <i>Cells</i>      |                    |               | <i>Cell Walls</i> |                     |                     |
|------------------|----------------|--------------------|-----------------|-------------------|--------------------|---------------|-------------------|---------------------|---------------------|
|                  | <i>color</i>   | <i>aggregation</i> | <i>moisture</i> | <i>morphology</i> | <i>dislocation</i> | <i>lignin</i> | <i>thickness</i>  | <i>delamination</i> | <i>fibrillation</i> |
| <b>untreated</b> | tan            | loose              | dry             | control           | none               | diffuse       | control           | none                | none                |
| <b>ZC</b>        | brown          | loose              | moist           | altered           | minor              | relocalized   | swollen           | minor               | none                |
| <b>SG</b>        | brown          | clumped            | wet             | collapsed         | extensive          | relocalized   | swollen           | extensive           | extensive           |
| <b>HS</b>        | brown          | clumped            | wet             | fractured         | extensive          | relocalized   | fractured         | extensive           | extensive           |

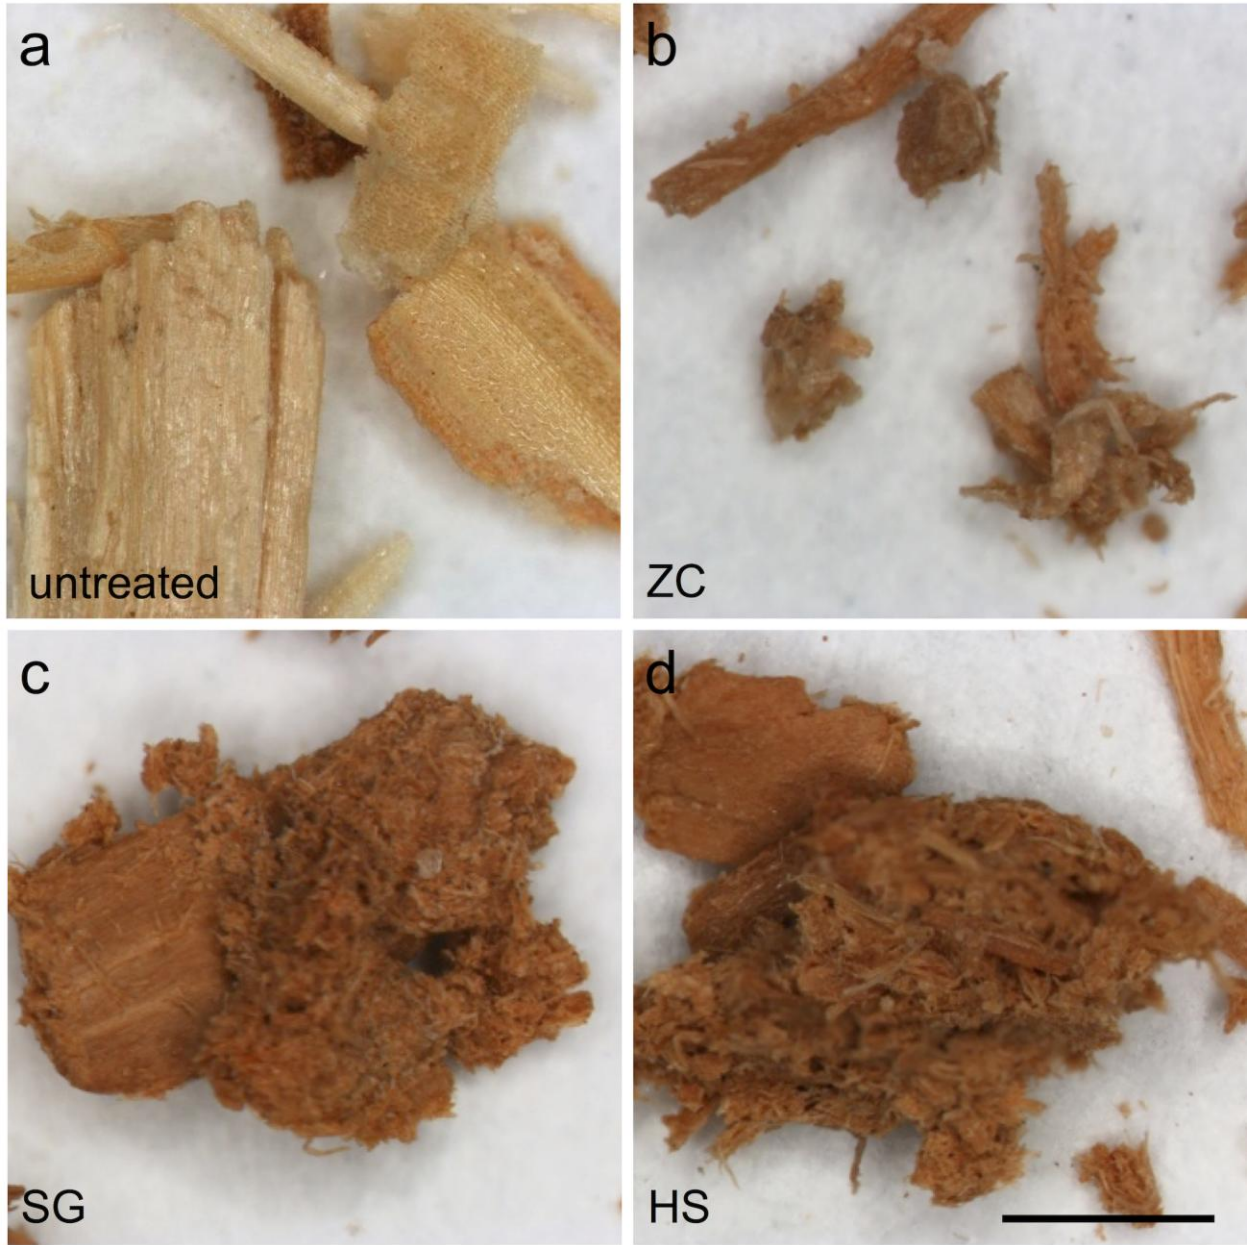

**Figure S1.** Stereo micrographs of freeze dried samples show that particles from the SG (c) and HS (d) reactors remain clumped even after drying. Bar = 1 mm.

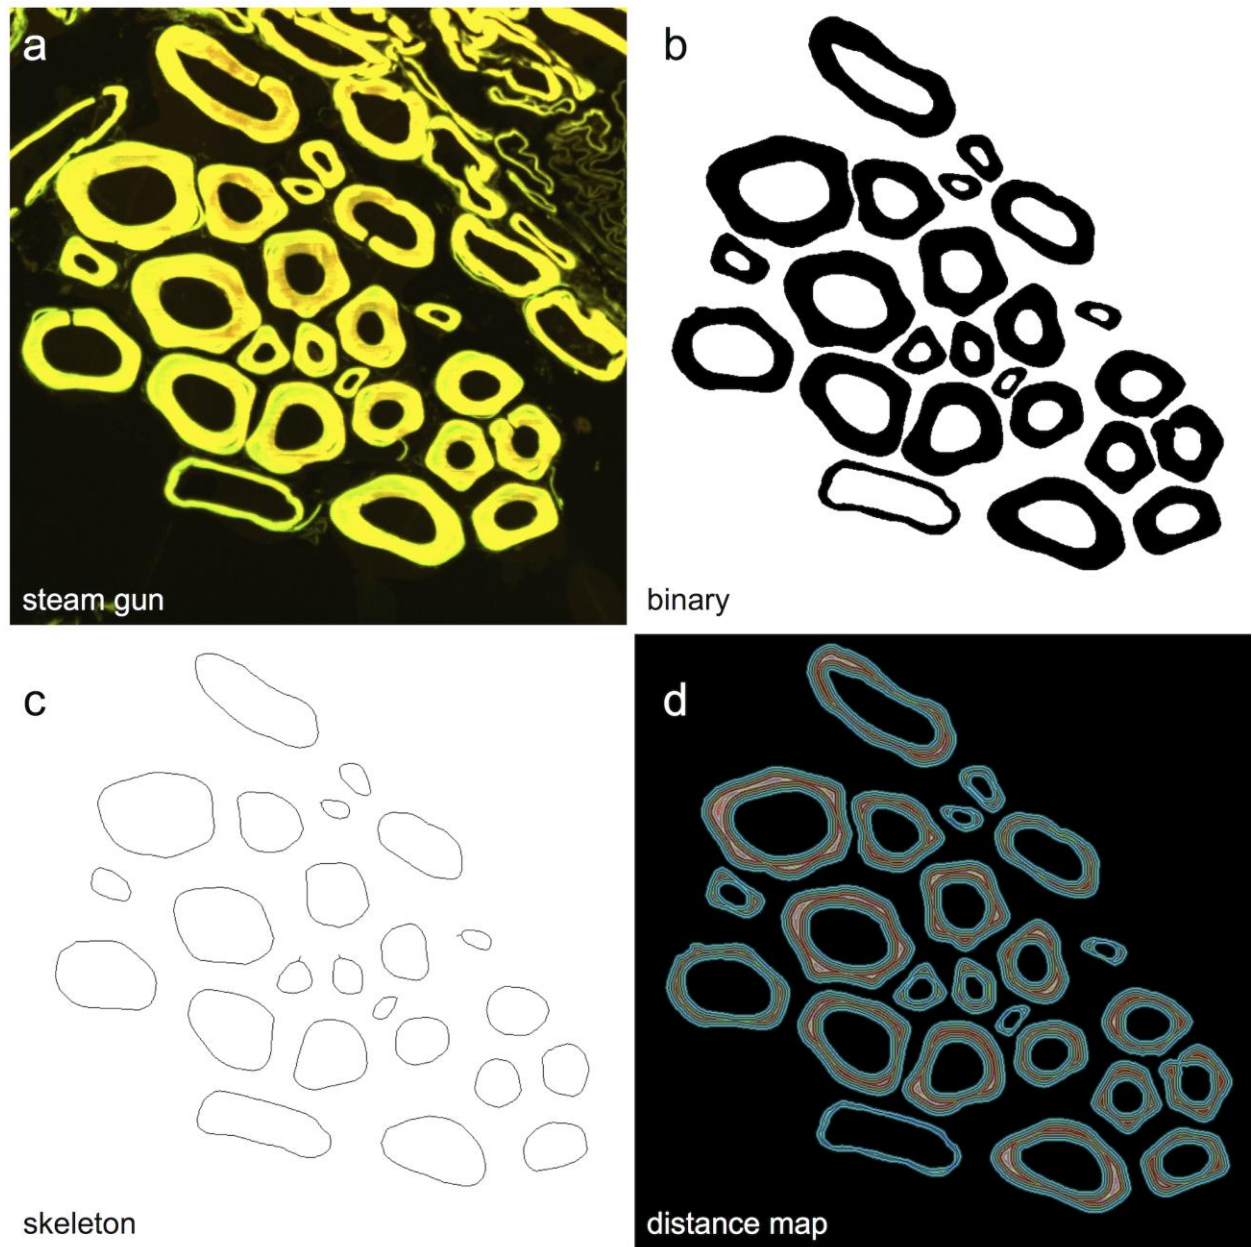

**Figure S2.** Measurements of cell wall thickness were extracted directly from confocal light microscopy image data (a) by first converting a region of interest within the image to binary format (b). The binary is then converted to a skeleton by a medial axis transform (c) and distance map (d) to derive a distance measurement from the centerline of the cell walls. For connected cells, this measurement reports the distance between the cell lumen and the midpoint of the compound middle lamella. For dislocated cells, it reports one half that distance.
